# Supplementary material for: Metabolic characterization of directly reprogrammed renal tubular epithelial cells (iRECs)
Source: PubMed Central journal article supplement (PMC5832874; doi:10.1038/s41598-018-22073-7), 2018-03-01
Supplement: 41598_2018_22073_MOESM1_ESM.pdf [file 41598_2018_22073_MOESM1_ESM.pdf]

## **Metabolic characterization of directly reprogrammed renal tubular epithelial cells (iRECs) – Supplementary Data**

Simon Lagies<sup>1,2,3+</sup>, Roman Pichler<sup>4+</sup>, Michael M. Kaminski<sup>4</sup>, Manuel Schlimpert<sup>1,2,3</sup>,  
Gerd Walz<sup>4,5</sup>, Soeren S. Lienkamp<sup>4,5\*</sup>, Bernd Kammerer<sup>1,5\*</sup>

<sup>1</sup> Center for Biosystems Analysis (ZBSA), Albert-Ludwigs-University Freiburg, Habsburgerstr. 49, 79104 Freiburg, Germany

<sup>2</sup> Spemann Graduate School of Biology and Medicine (SGBM), University of Freiburg, Albertstr. 19a, 79104 Freiburg, Germany

<sup>3</sup> Faculty of Biology, University of Freiburg, Schänzlestr. 1, 79104 Freiburg, Germany

<sup>4</sup> Department of Medicine, Renal Division, Medical Center—University of Freiburg, Faculty of Medicine, University of Freiburg, Hugstetter Str. 55, 79106 Freiburg, Germany

<sup>5</sup> BIOS Centre of Biological Signalling Studies, University of Freiburg, Schänzlestr. 18, 79104 Freiburg, Germany

+ equal contribution

\* Correspondence should be addressed to [soeren.lienkamp@uniklinik-freiburg.de](mailto:soeren.lienkamp@uniklinik-freiburg.de) or [bernd.kammerer@zbsa.uni-freiburg.de](mailto:bernd.kammerer@zbsa.uni-freiburg.de)

### Supplementary table S1: Adjusted extraction volume for the different tissue weights

| Kidney sample number | Kidney weight [mg] | Adjusted volume<br>for extraction [ml] |
|----------------------|--------------------|----------------------------------------|
| 1                    | 240                | 1.50                                   |
| 2                    | 220                | 1.38                                   |
| 3                    | 200                | 1.25                                   |
| 4                    | 210                | 1.31                                   |
| 5                    | 190                | 1.19                                   |
| 6                    | 190                | 1.19                                   |

**Supplementary table S2: Randomized injection order for untargeted GC/MS profiling and targeted LC/MS validation**

| Injection order | GC/MS analysis          | LC/MS analysis       |
|-----------------|-------------------------|----------------------|
| 1               | n-hexane blank          | Equilibration pool 1 |
| 2               | C10-C40 alkane standard | Equilibration pool 2 |
| 3               | Equilibration pool 1    | Equilibration pool 3 |
| 4               | Equilibration pool 2    | Equilibration pool 4 |
| 5               | Equilibration pool 3    | Equilibration pool 5 |
| 6               | Equilibration pool 4    | Equilibration pool 6 |
| 7               | Equilibration pool 5    | MEF_CP3              |
| 8               | Equilibration pool 6    | Pool_1               |
| 9               | MEF_NT_3                | MEF_NT_1             |
| 10              | iREC_CP_2               | iREC_CP2             |
| 11              | iREC_CP_3               | IMCD_NT_3            |
| 12              | Kidney_4                | iREC_CP1             |
| 13              | MEF_CP_3                | iREC_NT_2            |
| 14              | Pool_differentiation_1  | iREC_CP3             |
| 15              | iREC_CP_1               | Pool_2               |
| 16              | MEF_CP_1                | MEF_CP1              |
| 17              | Kidney_2                | IMCD_CP1             |
| 18              | Equilibration pool 9    | IMCD_NT_2            |
| 19              | Blank plate_3           | blank1               |
| 20              | MEF_NT_2                | MEF_CP2              |
| 21              | Kidney_3                | iREC_NT_3            |
| 22              | Kidney_6                | IMCD_CP2             |
| 23              | IMCD_NT_3               | MEF_NT_2             |
| 24              | iREC_NT_2               | blank3               |
| 25              | Blank plate_2           | MEF_NT_3             |
| 26              | IMCD_CP_1               | IMCD_NT_1            |
| 27              | Equilibration pool 7    | blank2               |
| 28              | IMCD_NT_2               | iREC_NT_1            |
| 29              | Kidney_1                | Pool_3               |
| 30              | IMCD_CP_3               | IMCD_CP3             |
| 31              | Pool_differentiation_3  |                      |
| 32              | Kidney_5                |                      |

|    |                        |  |
|----|------------------------|--|
| 33 | iREC_NT_1              |  |
| 34 | Pool_CP_1              |  |
| 35 | Pool_CP_2              |  |
| 36 | MEF_CP_2               |  |
| 37 | iREC_NT_3              |  |
| 38 | IMCD_CP_2              |  |
| 39 | MEF_NT_1               |  |
| 40 | Pool_CP_3              |  |
| 41 | Equilibration pool 8   |  |
| 42 | IMCD_NT_1              |  |
| 43 | Pool_differentiation_2 |  |
| 44 | Blank plate_1          |  |

**Supplementary table S3: Optimized mass spectrometry parameters and retention time of key metabolites changed upon cisplatin**

| Compound name                                          | Precursor ion [m/z] | Quantifier/qualifier ions [m/z]     | Retention time [min] | Fragmentor Voltage [V] | Collision Energy [V] | Accelerator Voltage [V] | Polarity |
|--------------------------------------------------------|---------------------|-------------------------------------|----------------------|------------------------|----------------------|-------------------------|----------|
| <sup>13</sup> C <sub>3</sub> -Pyruvate                 | 90.1                | 45.1                                | 3.18                 | 60                     | 7                    | 3                       | Negative |
| <sup>13</sup> C <sub>4</sub> <sup>15</sup> N-Aspartate | 139.1               | 92.2/77.2, 48.2, 45.2               | 3.88                 | 60                     | 8/12, 20, 24         | 4                       | Positive |
| 3-Phosphoglycerate                                     | 185                 | 97/79, 167                          | 5.15                 | 60                     | 13/37, 5             | 4                       | Negative |
| 4-OH-Proline                                           | 132.1               | 86.1/68.1, 58.2, 41.1               | 3.79                 | 80                     | 9/21, 25, 33         | 3                       | Positive |
| Alanine                                                | 90.1                | 44.1                                | 3.74                 | 45                     | 9                    | 3                       | Positive |
| alpha-Ketoglutarate                                    | 145.1               | 101/57.1                            | 4.76                 | 60                     | 4/0                  | 4                       | Negative |
| Arginine                                               | 175.1               | 70.1/130.1, 116.1, 60.1             | 7                    | 100                    | 25/9, 9, 13          | 3                       | Positive |
| Asparagine                                             | 133.1               | 74.1/87.1, 46.1, 44.1               | 3.95                 | 50                     | 13/5, 17, 17         | 3                       | Positive |
| Aspartate                                              | 134                 | 88.1/74.1, 46.1, 43.1               | 3.88                 | 50                     | 5/9, 13, 21          | 3                       | Positive |
| Citrate                                                | 191                 | 87.1/111.1, 85.1, 67.1              | 5.2                  | 60                     | 12/8, 12, 24         | 4                       | Negative |
| Cystine                                                | 241                 | 74.2/152.2, 122.2, 120.2            | 4.5                  | 84                     | 28/8, 16, 20         | 4                       | Positive |
| d <sub>4</sub> -Succinate                              | 121                 | 77.1/102.1                          | 4.85                 | 84                     | 9/9                  | 4                       | Negative |
| Dihydroxyacetone-phosphate                             | 169                 | 79/97                               | 5.05                 | 84                     | 25/9                 | 4                       | Negative |
| Fructose                                               | 179.1               | 89.2/113.2, 113.2, 71.2, 59.1, 43.2 | 4.47                 | 60                     | 4/0, 4, 12, 16, 28   | 4                       | Negative |
| Fructose-1-6-bisphosphate                              | 339                 | 97/241, 79                          | 5.17                 | 110                    | 13/5, 40             | 3                       | Negative |
| Fructose-6-phosphate                                   | 259                 | 97/169.1, 139, 79                   | 5.15                 | 84                     | 13/9, 13, 49         | 4                       | Negative |
| Fumarate                                               | 115                 | 71                                  | 4.79                 | 60                     | 0                    | 4                       | Negative |
| Glucose                                                | 179.1               | 89.1/123.9, 119.1, 71.2, 59.1, 43.3 | 4.72                 | 60                     | 4/0, 0, 12, 16, 28   | 4                       | Negative |
| Glucose-6-phosphate                                    | 259                 | 97/199, 139, 79                     | 5.25                 | 84                     | 13/5, 9, 49          | 4                       | Negative |
| Glutamate                                              | 148.1               | 84.1/130.1, 102.1, 56.1             | 3.8                  | 70                     | 13/5, 5, 29          | 3                       | Positive |
| Glutamine                                              | 147.1               | 130.1, 56.1, 41.1                   | 3.9                  | 70                     | 5/33, 29             | 3                       | Positive |
| Glyceraldehyde-3-phosphate                             | 169.1               | 79/151.1, 97                        | 5.15                 | 80                     | 35/15, 15            | 3                       | Negative |
| Glycine                                                | 76                  | 30.3                                | 3.9                  | 40                     | 5                    | 3                       | Positive |

|                             |       |                          |      |     |               |   |          |
|-----------------------------|-------|--------------------------|------|-----|---------------|---|----------|
| <b>Histidine</b>            | 156.1 | 110.1/93.1, 83.1, 56.1   | 6.1  | 80  | 9/25, 25, 37  | 3 | Positive |
| <b>Isocitrate</b>           | 191   | 73.1/173.1, 111, 85.1    | 5.1  | 84  | 21/9, 9, 13   | 4 | Negative |
| <b>Isoleucine</b>           | 132.1 | 69.1/86.1, 44.2          | 3.15 | 50  | 25/5, 25      | 3 | Positive |
| <b>Lactate</b>              | 89    | 43.1                     | 4.41 | 60  | 15            | 3 | Negative |
| <b>Leucine</b>              | 132.1 | 43.2/86.1, 44.1, 30.1    | 3    | 60  | 25/5, 21, 13  | 3 | Positive |
| <b>Lysine</b>               | 147.1 | 130.1/84.1, 67.1, 56.1   | 7.5  | 70  | 5/13, 25, 33  | 3 | Positive |
| <b>Malate</b>               | 133   | 115.1/73, 71.1, 43.1     | 4.9  | 60  | 4/12, 12, 16  | 4 | Negative |
| <b>Methionine</b>           | 150.1 | 56.1/133.1, 104.1, 61.1  | 3.2  | 60  | 13/5, 5, 21   | 3 | Positive |
| <b>o-Tyrosine</b>           | 182.1 | 136.1/165.1, 123.1, 91   | 2.9  | 60  | 9/5, 13, 29   | 3 | Positive |
| <b>Phenylalanine</b>        | 166.1 | 120.1/103.1, 91.1, 77.1  | 3    | 70  | 9/29, 37, 40  | 3 | Positive |
| <b>Phosphoenol-pyruvate</b> | 167   | 79                       | 5.12 | 60  | 9             | 4 | Negative |
| <b>Proline</b>              | 116.1 | 70.1/68.1, 43.1, 28.1    | 3.5  | 70  | 13/33, 33, 37 | 3 | Positive |
| <b>Pyruvate</b>             | 87    | 43.1                     | 3.18 | 60  | 5             | 3 | Negative |
| <b>Serine</b>               | 106.1 | 60.1/88.1, 70.1, 42.1    | 4    | 50  | 5/5, 9, 5     | 3 | Positive |
| <b>Succinate</b>            | 117   | 73.1/99.1                | 4.85 | 60  | 8/4           | 3 | Negative |
| <b>Taurine</b>              | 126   | 44.2/108.1, 97.1, 65.1   | 3.4  | 108 | 20/8, 24, 44  | 4 | Positive |
| <b>Threonine</b>            | 120.1 | 56.1/102.1, 74.1, 57     | 3.8  | 50  | 13/5, 5, 17   | 3 | Positive |
| <b>Tryptophan</b>           | 205.1 | 188.1/146.1, 118.1, 91.1 | 2.9  | 70  | 5/13, 25, 40  | 3 | Positive |
| <b>Tyrosine</b>             | 182.1 | 136.1/165.1, 123.1, 91   | 3.4  | 60  | 9/5, 13, 29   | 3 | Positive |
| <b>Valine</b>               | 118.1 | 72.1/57.1, 55.1, 29.1    | 3.5  | 50  | 5/29, 17, 29  | 3 | Positive |

## Supplementary table S4: Validation of methodology for key metabolites changed upon cisplatin

| Metabolite                 | Abbreviation       | Sum formula                                                                 | R <sup>2</sup> | Equation of regression | lowest tested concentration with Signal/Noise >= 5 [ng/μl] |
|----------------------------|--------------------|-----------------------------------------------------------------------------|----------------|------------------------|------------------------------------------------------------|
| 3-Phosphoglyceric acid     | 3-PG               | C <sub>3</sub> H <sub>7</sub> O <sub>7</sub> P                              | 0.966003       | y = 7.6787x-6.1506     | 15                                                         |
| 4-Hydroxyproline           | 4-OH-Proline       | C <sub>5</sub> H <sub>9</sub> NO <sub>3</sub>                               | 0.996154       | y = 0.3007x-3.1506     | 0.2                                                        |
| alpha-Ketoglutaric acid    | a-KG               | C <sub>5</sub> H <sub>6</sub> O <sub>5</sub>                                | 0.988594       | y = 0.0037x-0.1506     | 15                                                         |
| Alanine                    | -                  | C <sub>3</sub> H <sub>7</sub> NO <sub>2</sub>                               | 0.983956       | y = 0.0747x-0.1506     | 0.0416                                                     |
| Arginine                   | -                  | C <sub>6</sub> H <sub>14</sub> N <sub>4</sub> O <sub>2</sub>                | 0.843329       | y = 0.0017x-0.1506     | 0.0416                                                     |
| Asparagine                 | -                  | C <sub>4</sub> H <sub>8</sub> N <sub>2</sub> O <sub>3</sub>                 | 0.997408       | y = 0.0177x-0.1506     | 0.2                                                        |
| Aspartate                  | -                  | C <sub>4</sub> H <sub>7</sub> NO <sub>4</sub>                               | 0.99756        | y = 0.0037x-0.1506     | 0.2                                                        |
| Citrate                    | -                  | C <sub>6</sub> H <sub>8</sub> O <sub>7</sub>                                | 0.96894        | y = 0.0027x-0.1506     | 15                                                         |
| Cystine                    | -                  | C <sub>6</sub> H <sub>12</sub> N <sub>2</sub> O <sub>4</sub> S <sub>2</sub> | 0.850668       | y = 0.0017x-0.1506     | 20                                                         |
| Fructose-6-phosphate       | F-6-P              | C <sub>6</sub> H <sub>13</sub> O <sub>9</sub> P                             | 0.985592       | y = 0.0007x-0.1506     | 15                                                         |
| Fructose                   | -                  | C <sub>6</sub> H <sub>12</sub> O <sub>6</sub>                               | 0.9675         | y = 0.0007x-0.1506     | 15                                                         |
| Fructose-1,6-bisphosphate  | Fructose-1-6-P2    | C <sub>6</sub> H <sub>14</sub> O <sub>12</sub> P <sub>2</sub>               | 0.857609       | y = 3.8027x-8.1506     | 3.12                                                       |
| Fumarat                    | -                  | C <sub>4</sub> H <sub>4</sub> O <sub>4</sub>                                | 0.959924       | y = 0.0007x-0.1506     | 0.3                                                        |
| Glucose-6-phosphate        | G-6-P              | C <sub>6</sub> H <sub>13</sub> O <sub>9</sub> P                             | 0.995898       | y = 0.0007x-0.1506     | 6.2                                                        |
| Glucose                    | -                  | C <sub>6</sub> H <sub>12</sub> O <sub>6</sub>                               | 0.966061       | y = 7.6737x-6.1506     | 0.62                                                       |
| Glutamate                  | -                  | C <sub>5</sub> H <sub>9</sub> NO <sub>4</sub>                               | 0.985351       | y = 0.0367x-0.1506     | 0.0416                                                     |
| Glutamine                  | -                  | C <sub>5</sub> H <sub>10</sub> N <sub>2</sub> O <sub>3</sub>                | 0.994367       | y = 0.5657x-5.1506     | 0.0416                                                     |
| Glyceraldehyde-3-phosphate | Glyceraldehyde-3-P | C <sub>3</sub> H <sub>7</sub> O <sub>6</sub> P                              | 0.810612       | y = 9.1977x-1.1506     | 15                                                         |
| Glycine                    | -                  | C <sub>2</sub> H <sub>5</sub> NO <sub>2</sub>                               | 0.992682       | y = 0.0017x-0.1506     | 0.0416                                                     |
| Histidine                  | -                  | C <sub>6</sub> H <sub>9</sub> N <sub>3</sub> O <sub>2</sub>                 | 0.587296       | y = 0.0017x-0.1506     | 0.0416                                                     |
| Isocitrat                  | -                  | C <sub>6</sub> H <sub>8</sub> O <sub>7</sub>                                | 0.927715       | y = 0.0017x-0.1506     | 6.2                                                        |
| Isoleucine                 | -                  | C <sub>6</sub> H <sub>13</sub> NO <sub>2</sub>                              | 0.986358       | y = 0.0077x-0.1506     | 0.2                                                        |
| Lactate                    | -                  | C <sub>3</sub> H <sub>6</sub> O <sub>3</sub>                                | 0.988113       | y = 0.0007x-0.1506     | 0.0626                                                     |
| Leucine                    | -                  | C <sub>6</sub> H <sub>13</sub> NO <sub>2</sub>                              | 0.972434       | y = 0.0127x-0.1506     | 0.104                                                      |
| Lysine                     | -                  | C <sub>6</sub> H <sub>14</sub> N <sub>2</sub> O <sub>2</sub>                | 0.994367       | y = 0.5657x-5.1506     | 0.0416                                                     |
| Malat                      | -                  | C <sub>4</sub> H <sub>6</sub> O <sub>5</sub>                                | 0.992823       | y = 0.0127x-0.1506     | 3.12                                                       |
| Methionine                 | -                  | C <sub>5</sub> H <sub>11</sub> NO <sub>2</sub> S                            | 0.973717       | y = 0.0167x-0.1506     | 0.2                                                        |
| ortho-Tyrosine             | o-Tyrosine         | C <sub>9</sub> H <sub>11</sub> NO <sub>3</sub>                              | 0.851967       | y = 0.0907x-0.1506     | 0.104                                                      |
| Phosphoenolpyruvate        | PEP                | C <sub>3</sub> H <sub>5</sub> O <sub>6</sub> P                              | 0.999403       | y = 0.0007x-0.1506     | 0.62                                                       |

|                      |   |                                                               |          |                    |        |
|----------------------|---|---------------------------------------------------------------|----------|--------------------|--------|
| <b>Phenylalanine</b> | - | C <sub>9</sub> H <sub>11</sub> NO <sub>2</sub>                | 0.982843 | y = 0.1867x-1.1506 | 0.0416 |
| <b>Proline</b>       | - | C <sub>5</sub> H <sub>9</sub> NO <sub>2</sub>                 | 0.993064 | y = 0.7247x-7.1506 | 0.0416 |
| <b>Pyruvate</b>      | - | C <sub>3</sub> H <sub>4</sub> O <sub>3</sub>                  | 0.999601 | y = 0.0057x-0.1506 | 0.3    |
| <b>Serine</b>        | - | C <sub>3</sub> H <sub>7</sub> NO <sub>3</sub>                 | 0.980071 | y = 0.0277x-0.1506 | 0.0416 |
| <b>Succinate</b>     | - | C <sub>4</sub> H <sub>6</sub> O <sub>4</sub>                  | 0.978143 | y = 0.0037x-0.1506 | 0.0626 |
| <b>Taurine</b>       | - | C <sub>2</sub> H <sub>7</sub> NO <sub>3</sub> S               | 0.981986 | y = 0.0077x-0.1506 | 0.0416 |
| <b>Threonine</b>     | - | C <sub>4</sub> H <sub>9</sub> NO <sub>3</sub>                 | 0.992306 | y = 0.0427x-0.1506 | 0.0416 |
| <b>Tryptophan</b>    | - | C <sub>11</sub> H <sub>12</sub> N <sub>2</sub> O <sub>2</sub> | 0.948304 | y = 0.0520x-0.4891 | 0.4    |
| <b>Tyrosine</b>      | - | C <sub>9</sub> H <sub>11</sub> NO <sub>3</sub>                | 0.997303 | y = 0.0457x-0.1506 | 0.104  |
| <b>Valine</b>        | - | C <sub>5</sub> H <sub>11</sub> NO <sub>2</sub>                | 0.998356 | y = 0.2137x-2.1506 | 0.0416 |



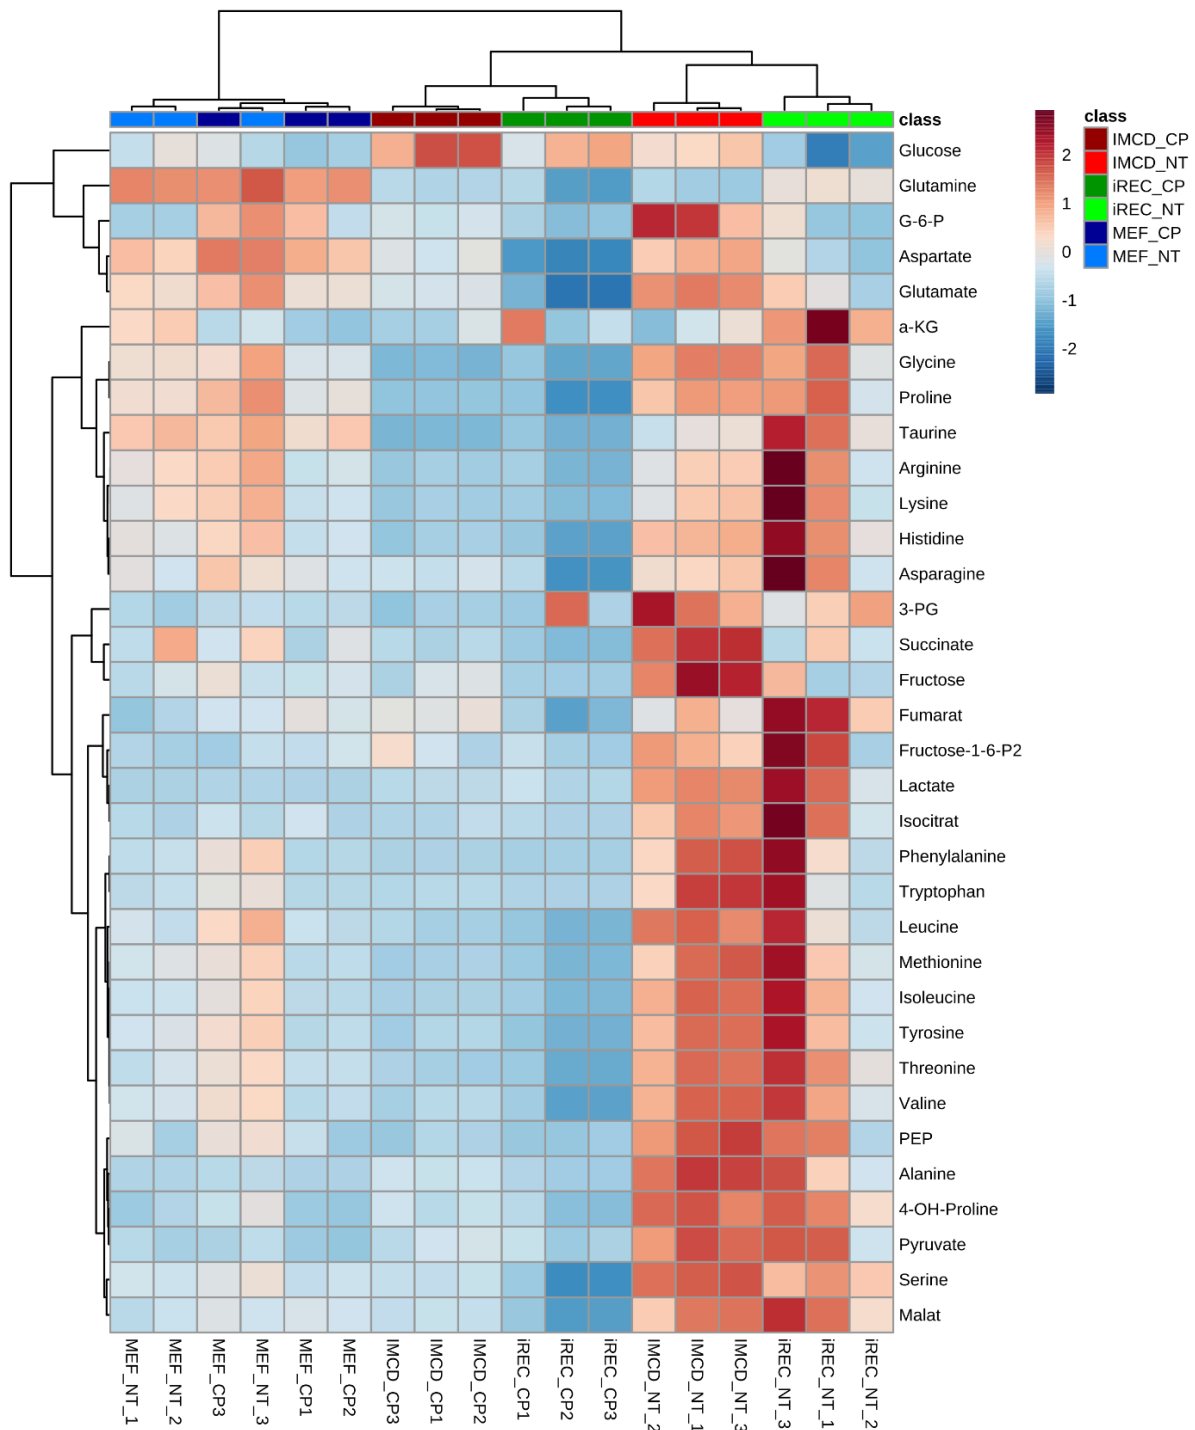

**Supplementary figure S1: Heat map and cluster analysis of endometabolome discriminates cisplatin treatment only in renal epithelial cells.** Range-scaled Z-scores of annotated features acquired by targeted multiple reaction monitoring (MRM). Displayed are metabolites with  $q$ -value  $< 0.05$  according to ANOVA and FDR. No effect could be observed in MEFs after cisplatin application, while there was a strong influence on renal epithelial cells. Amino acids and intermediates of glycolysis and the TCA-cycle were concomitantly down-regulated by cisplatin in iRECs and mIMCD-3 cells, whereas glucose accumulated after cisplatin-treatment. Detection of phosphorylated glycolysis intermediates in cisplatin-treated samples were below the linear range. Therefore, these alterations should be judged qualitatively. Light color: untreated, dark color: Cisplatin-treated; blue: MEFs, red: mIMCD-3 cells, green: iRECs, each  $n=3$

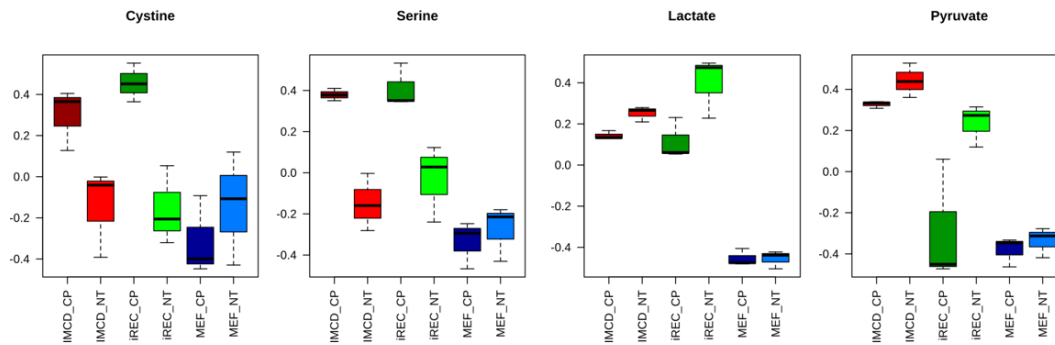

**Supplementary figure S2: Box plots of significantly altered exometabolites after cisplatin-treatment.** Range-scaled Z-scores of annotated features acquired by targeted MRM-acquisition. Exometabolites with a q-value < 0.05 according to ANOVA and FDR as well as a positive post-hoc test after treatment in the same cellular back-ground are shown. No alterations were observed in MEFs, serine was the sole metabolite significantly changed in mIMCD-3 cells and all displayed metabolites changed significantly in iRECs. Light color: untreated, dark color: Cisplatin-treated; blue: MEFs, red: mIMCD-3 cells, green: iRECs, each n=3
